# Supplementary material
Source: publisher figshare collection journal article supplement (https://f1000.figshare.com/articles/dataset/_/98607)
Supplement: Supplementary file 1 [file 1]

### Influence of Teaching Structured Physical Examination Skills Training- A Retrospective Pre questionnaire

|    |                                                          | Before Training |               |                    |                |                                            | After Training |                    |                |                                            |  |
|----|----------------------------------------------------------|-----------------|---------------|--------------------|----------------|--------------------------------------------|----------------|--------------------|----------------|--------------------------------------------|--|
|    | Skills                                                   | Not aware       | Not confident | Somewhat confident | Very Confident | Will be able to do independently in future | Not confident  | Somewhat confident | Very Confident | Will be able to do independently in future |  |
| 1  | Measuring body temperature                               |                 |               |                    |                |                                            |                |                    |                |                                            |  |
| 2  | Measuring Respiratory Rate                               |                 |               |                    |                |                                            |                |                    |                |                                            |  |
| 3  | Recording Pulse                                          |                 |               |                    |                |                                            |                |                    |                |                                            |  |
| 4  | Measuring Blood Pressure                                 |                 |               |                    |                |                                            |                |                    |                |                                            |  |
| 5  | Detecting Pedal Edema                                    |                 |               |                    |                |                                            |                |                    |                |                                            |  |
| 6  | Detecting Cyanosis                                       |                 |               |                    |                |                                            |                |                    |                |                                            |  |
| 7  | Detecting Clubbing                                       |                 |               |                    |                |                                            |                |                    |                |                                            |  |
| 8  | Palpating cervical Lymph Nodes                           |                 |               |                    |                |                                            |                |                    |                |                                            |  |
| 9  | Demonstrating range of motion at elbow Joint             |                 |               |                    |                |                                            |                |                    |                |                                            |  |
| 10 | Demonstrating range of motion at Hip Joint               |                 |               |                    |                |                                            |                |                    |                |                                            |  |
| 11 | Palpating Peripheral Pulses                              |                 |               |                    |                |                                            |                |                    |                |                                            |  |
| 12 | Assess expansion of the chest                            |                 |               |                    |                |                                            |                |                    |                |                                            |  |
| 13 | Determining Position of Trachea or palpation for Trachea |                 |               |                    |                |                                            |                |                    |                |                                            |  |
| 14 | Percussion of Anterior Chest                             |                 |               |                    |                |                                            |                |                    |                |                                            |  |
| 15 | Auscultation of Posterior Chest                          |                 |               |                    |                |                                            |                |                    |                |                                            |  |
| 16 | Eliciting Vocal Resonance on anterior chest              |                 |               |                    |                |                                            |                |                    |                |                                            |  |
| 17 | Measuring Jugular Venous Pressure                        |                 |               |                    |                |                                            |                |                    |                |                                            |  |
| 18 | Localizing of Apex Beat                                  |                 |               |                    |                |                                            |                |                    |                |                                            |  |
| 19 | Auscultation of Precordium                               |                 |               |                    |                |                                            |                |                    |                |                                            |  |
| 20 | Use of otoscope in examining ear                         |                 |               |                    |                |                                            |                |                    |                |                                            |  |
| 21 | Use of nasal speculum in examining ear                   |                 |               |                    |                |                                            |                |                    |                |                                            |  |
| 22 | Use of head mirror with light in examining ear           |                 |               |                    |                |                                            |                |                    |                |                                            |  |
| 23 | Measurement of Visual Acuity                             |                 |               |                    |                |                                            |                |                    |                |                                            |  |
| 24 | Measurement of Visual Fields by confrontation method     |                 |               |                    |                |                                            |                |                    |                |                                            |  |

|     |                                                               | Before Training |               |                    |                |                                            | After Training |                    |                |                                            |  |
|-----|---------------------------------------------------------------|-----------------|---------------|--------------------|----------------|--------------------------------------------|----------------|--------------------|----------------|--------------------------------------------|--|
|     | Skills                                                        | Not aware       | Not confident | Somewhat confident | Very Confident | Will be able to do independently in future | Not confident  | Somewhat confident | Very Confident | Will be able to do independently in future |  |
| 25  | Examination of uniocular eye movement (Muscles)               |                 |               |                    |                |                                            |                |                    |                |                                            |  |
| 26  | Examination of Pupillary Light Reaction                       |                 |               |                    |                |                                            |                |                    |                |                                            |  |
| 27  | Palpation of Liver                                            |                 |               |                    |                |                                            |                |                    |                |                                            |  |
| 28  | Palpation of Kidneys                                          |                 |               |                    |                |                                            |                |                    |                |                                            |  |
| 29  | Palpation of Spleen                                           |                 |               |                    |                |                                            |                |                    |                |                                            |  |
| 30  | Eliciting of Shifting Dullness                                |                 |               |                    |                |                                            |                |                    |                |                                            |  |
| 31  | Measurement of Liver Span                                     |                 |               |                    |                |                                            |                |                    |                |                                            |  |
| 32  | Examination of Facial Nerve                                   |                 |               |                    |                |                                            |                |                    |                |                                            |  |
| 33  | Examination of Accessory nerve                                |                 |               |                    |                |                                            |                |                    |                |                                            |  |
| 34  | Eliciting Tone of Muscles in Upper Limbs                      |                 |               |                    |                |                                            |                |                    |                |                                            |  |
| 35  | Eliciting Reflexes in Lower Limbs                             |                 |               |                    |                |                                            |                |                    |                |                                            |  |
| 36  | Eliciting Planter Response                                    |                 |               |                    |                |                                            |                |                    |                |                                            |  |
| 37  | Eliciting Position Sense in Lower Limbs                       |                 |               |                    |                |                                            |                |                    |                |                                            |  |
| 38. | Assessing orientation to time, place and person               |                 |               |                    |                |                                            |                |                    |                |                                            |  |
| 39  | Measurement of Height in Children                             |                 |               |                    |                |                                            |                |                    |                |                                            |  |
| 40  | Measurement of Mid arm Circumference in Children              |                 |               |                    |                |                                            |                |                    |                |                                            |  |
| 41  | Demonstration dehydration in infants                          |                 |               |                    |                |                                            |                |                    |                |                                            |  |
| 42  | Counting Respiratory rate in children under five years of age |                 |               |                    |                |                                            |                |                    |                |                                            |  |
| 43  | Demonstration of pallor in children                           |                 |               |                    |                |                                            |                |                    |                |                                            |  |
| 44  | Demonstration of jaundice in children                         |                 |               |                    |                |                                            |                |                    |                |                                            |  |
| 45  | Measurement of Height of Fundus                               |                 |               |                    |                |                                            |                |                    |                |                                            |  |
| 46  | Eliciting obstetrical grips or Leopold’s maneuver             |                 |               |                    |                |                                            |                |                    |                |                                            |  |
|     |                                                               |                 |               |                    |                |                                            |                |                    |                |                                            |  |
|     |                                                               |                 |               |                    |                |                                            |                |                    |                |                                            |  |
